# Supplementary material
Source: PubMed Central journal article supplement (PMC1472519)

**A**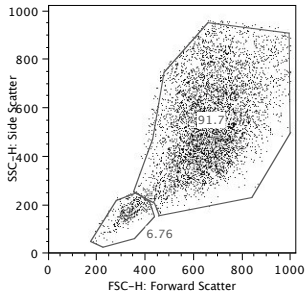**B**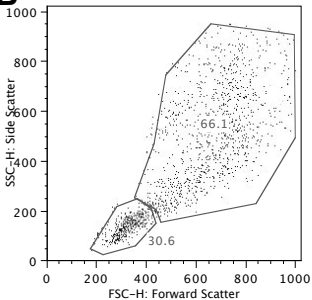**C**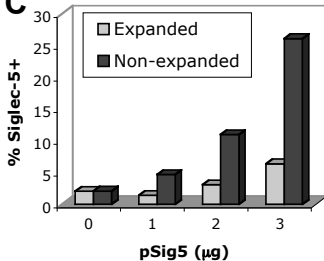

Supplement: pnas_0510484103_1.pdf [file pnas_0510484103_1.pdf]
